# Supplementary figures and images for: Polyurethane Foam Residue Biodegradation through the Tenebrio molitor Digestive Tract: Microbial Communities and Enzymatic Activity
Source: MDPI journal article supplement (doi:10.3390/polym15010204), 2022-12-31

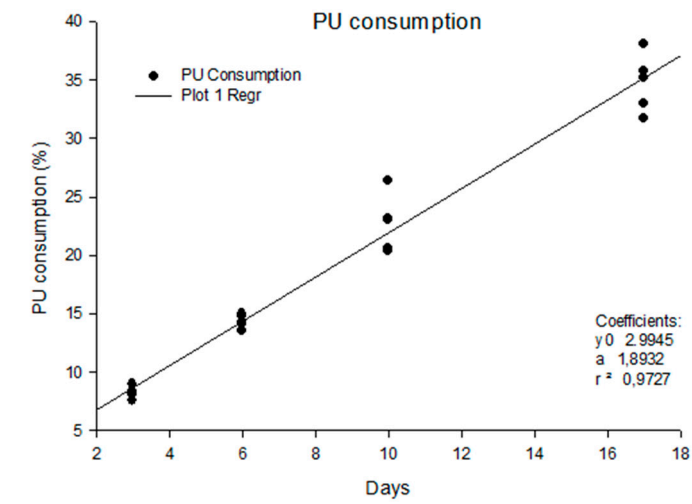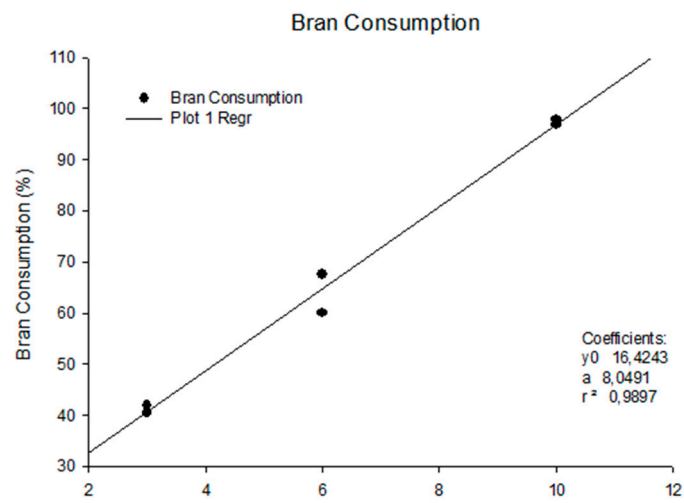

Figure S1. Spearman Correlation between PU and Bran consumption and days of the experiment.

Supplement: s1 [file s1]
